# Supplementary material for: Discoloration Investigations of Yellow Lantern Pepper Sauce (Capsicum chinense Jacq.) Fermented by Lactobacillus plantarum: Effect of Carotenoids and Physiochemical Indices
Source: MDPI journal article supplement (doi:10.3390/molecules27207139), 2022-10-21
Supplement: s1 [file s1]

**Table S1.** Regression equation of carotenoid standards separated by LC-MSMS analysis.

| Carotenoid standards   | Regression Equation           | Coefficient of Determination (R2) |
|------------------------|-------------------------------|-----------------------------------|
| Phytofluene            | $y = 1.01893 x + 0.01762$     | 0.99156                           |
| Phytoene               | $y = 0.31801 x + 0.06991$     | 0.99427                           |
| $\epsilon$ -Carotene   | $y = 7.39225 x - 0.00101$     | 0.99104                           |
| $\alpha$ -Carotene     | $y = 1.88950 x - 9.95177e-4$  | 0.99427                           |
| $\beta$ -Carotene      | $y = 3.88371 x - 0.00451$     | 0.99691                           |
| Lycopene               | $y = 0.64511 x - 6.81716e-4$  | 0.99854                           |
| Violaxanthin           | $y = 19.21851 x + 0.01079$    | 0.99066                           |
| Neoxanthin             | $y = 9.58998 x + 0.00231$     | 0.99263                           |
| $\beta$ -citraurin     | $y = 26.97911 x + 0.00743$    | 0.99015                           |
| Antheraxanthin         | $y = 3.08713 x + 0.00587$     | 0.99127                           |
| Lutein                 | $y = 4.09580 x + 0.00722$     | 0.99114                           |
| Apocarotenal           | $y = 12.62865 x - 3.96567e-4$ | 0.99048                           |
| Zeaxanthin             | $y = 1.55523 x + 0.02137$     | 0.99831                           |
| $\beta$ -Cryptoxanthin | $y = 2.86672 x + 0.01271$     | 0.99189                           |
| $\gamma$ -Carotene     | $y = 2.63151 x - 0.00395$     | 0.99632                           |

**Table S2.** Regression equation of organic acids separated by HPLC analysis.

| Organic Acids | Regression Equation | Coefficient of Determination (R <sup>2</sup> ) |
|---------------|---------------------|------------------------------------------------|
| Oxalic acid   | $y=7229.7x+166423$  | 0.9958                                         |
| Tartaric acid | $y=1161.6+145350$   | 0.9921                                         |
| Malic acid    | $y=811.19x+14469$   | 0.9930                                         |
| Lactic acid   | $y=369.06+7309.7$   | 0.9989                                         |
| Acetic acid   | $y=284.49+33801$    | 0.9939                                         |
| Citric acid   | $y=1007.2+30824$    | 0.9917                                         |
| Succinic acid | $y=639.55+17248$    | 0.9966                                         |

**Table S3.** Carotenoid contents of the yellow lantern pepper sauce during fermentation.

| No<br>. | Compounds                     | Ionization<br>model    | Parent Ion<br>(Da) | Daughter<br>Ion (Da) | Contents of carotenoids and carotenoid esters (ug/g DW) |                |                |               |               |                |
|---------|-------------------------------|------------------------|--------------------|----------------------|---------------------------------------------------------|----------------|----------------|---------------|---------------|----------------|
|         |                               |                        |                    |                      | 0 d                                                     | 7 d            | 14 d           | 21 d          | 28 d          | 35 d           |
| 1       | $\alpha$ -Carotene            | [M+H] <sup>+</sup>     | 537.5              | 123.2                | 50.90±0.50                                              | 32.40±1.50     | 34.55±2.75     | 34.25±1.15    | 30.00±0.80    | 22.85±0.35     |
| 2       | $\beta$ -Carotene             | [M+H] <sup>+</sup>     | 537.6              | 177.1                | 61.30±1.40                                              | 34.70±3.20     | 33.55±2.15     | 39.15±2.55    | 34.00±2.30    | 21.60±1.40     |
| 3       | $\gamma$ -Carotene            | [M+H] <sup>+</sup>     | 537.4              | 177.3                | 3.83±0.19                                               | 2.19±0.17      | 2.35±0.30      | 2.44±0.09     | 2.05±0.04     | 1.321±0.14     |
| 4       | $\varepsilon$ -Carotene       | [M+H] <sup>+</sup>     | 537.6              | 123.2                | 1.14±0.05                                               | 0.81±0.03      | 0.71±0.02      | 0.72±0.07     | 0.59±0.04     | 0.52±0.02      |
| 5       | Lycopene                      | [M+H] <sup>+</sup>     | 537.4              | 81                   | 5.42±0.28                                               | 3.21±0.14      | 2.94±0.24      | 2.28±0.14     | 2.21±0.14     | 1.67±0.04      |
| 6       | (E/Z)-Phytoene                | [M+H] <sup>+</sup>     | 545.3              | 81                   | 2940.00±30.00                                           | 2155.00±125.00 | 2090.00±100.00 | 1860.00±30.00 | 1765.00±25.00 | 1300.00±150.00 |
| 7       | Antheraxanthin                | [M+H] <sup>+</sup>     | 585.5              | 175.4                | 0.34±0.00                                               | 0.17±0.00      | 0.15±0.01      | 0.15±0.01     | 0.11±0.01     | 0.11±0.01      |
| 8       | Violaxanthin                  | [M+H] <sup>+</sup>     | 601.4              | 565.4                | 2.32±0.24                                               | 2.62±0.09      | 2.32±0.13      | 1.98±0.02     | 1.26±0.07     | 1.80±0.15      |
| 9       | Zeaxanthin                    | [M+H] <sup>+</sup>     | 569.4              | 477.5                | 5.68±0.02                                               | 7.54±0.37      | 6.77±0.93      | 5.01±0.30     | 5.64±0.22     | 4.07±0.32      |
| 10      | Lutein                        | [M+H-18] <sup>+</sup>  | 551.5              | 175.4                | 69.55±0.05                                              | 54.97±2.95     | 55.95±4.85     | 42.00±1.50    | 38.70±0.00    | 33.90±1.60     |
| 11      | $\beta$ -Cryptoxanthin        | [M+H] <sup>+</sup>     | 553.5              | 177.4                | 6.02±0.06                                               | 4.41±0.03      | 4.01±0.35      | 4.52±0.01     | 4.51±0.22     | 3.07±0.09      |
| 12      | $\alpha$ -Cryptoxanthin       | [M+H] <sup>+</sup>     | 597.3              | 147.1                | 3.26±0.00                                               | 2.13±0.10      | 2.34±0.21      | 1.84±0.09     | 2.13±0.14     | 1.46±0.01      |
| 13      | Apocarotenal                  | [M+H] <sup>+</sup>     | 417.3              | 325.3                | 0.02±0.00                                               | 0.03±0.00      | 0.02±0.00      | 0.03±0.00     | 0.03±0.00     | 0.02±0.00      |
| 14      | Neoxanthin                    | [M+H] <sup>+</sup>     | 601.4              | 565.5                | 0.34±0.01                                               | 0.06±0.00      | 0.06±0.01      | 0.06±0.01     | 0.04±0.00     | 0.04±0.00      |
| 15      | Antheraxanthin<br>dipalmitate | [M+H] <sup>+</sup>     | 1061               | 805                  | 0.51±0.00                                               | N.D.           | N.D.           | N.D.          | N.D.          | N.D.           |
| 16      | Lutein caprate                | [M+H-18] <sup>+</sup>  | 705.7              | 533.5                | 0.32±0.05                                               | 0.21±0.01      | 0.50±0.10      | 0.23±0.01     | 0.13±0.02     | 0.29±0.06      |
| 17      | Lutein palmitate              | [M+H-18] <sup>+</sup>  | 789.8              | 533.5                | 4.98±0.14                                               | 3.08±0.29      | 3.49±0.13      | 2.69±0.16     | 2.17±0.06     | 2.54±0.04      |
| 18      | 5,6epoxy-Lutein<br>dilaurate  | [M+H-200] <sup>+</sup> | 749.6              | 549.5                | 0.81±0.10                                               | 0.59±0.04      | 0.58±0.08      | 0.52±0.02     | 0.49±0.07     | 0.35±0.04      |
| 19      | Lutein dilaurate              | [M+H-201] <sup>+</sup> | 733.5              | 533.3                | 7.66±0.23                                               | 7.81±0.04      | 6.82±0.44      | 5.70±0.21     | 6.08±0.04     | 5.40±0.44      |
| 20      | Lutein dimyristate            | [M+H-228] <sup>+</sup> | 761.8              | 533.5                | 39.50±2.40                                              | 30.70±1.00     | 32.85±1.65     | 28.55±0.05    | 30.85±0.65    | 23.45±2.15     |
| 21      | Lutein dipalmitate            | [M+H-256] <sup>+</sup> | 789.8              | 533.5                | 1.84±0.27                                               | 1.43±0.18      | 1.57±0.06      | 1.41±0.16     | 1.43±0.28     | 1.14±0.13      |
| 22      | Violaxanthin<br>dibutyrate    | [M+H] <sup>+</sup>     | 741.6              | 653.5                | 0.38±0.00                                               | 0.34±0.01      | 0.28±0.02      | 0.28±0.02     | 0.24±0.00     | 0.25±0.02      |
| 23      | Violaxanthin laurate          | [M+H-18] <sup>+</sup>  | 783.7              | 583.4                | N.D.                                                    | 2.60±0.35      | 1.99±0.26      | 2.20±0.42     | 1.34±0.03     | 1.25±0.04      |

|    |                                      |                        |        |       |            |            |            |            |            |            |
|----|--------------------------------------|------------------------|--------|-------|------------|------------|------------|------------|------------|------------|
| 24 | Violaxanthin<br>myristate            | [M+H] <sup>+</sup>     | 811.8  | 793.7 | 63.60±3.90 | 55.25±4.95 | 51.20±0.40 | 45.70±2.00 | 36.25±2.45 | 32.20±0.70 |
| 25 | Violaxanthin<br>palmitoleate         | [M+H] <sup>+</sup>     | 837.7  | 745.6 | 0.20±0.04  | 0.17±0.01  | 0.20±0.02  | 0.13±0.03  | 0.14±0.00  | 0.14±0.01  |
| 26 | Violaxanthin<br>dilaurate            | [M+H] <sup>+</sup>     | 966.7  | 948.8 | 4.25±0.46  | 2.71±0.18  | 2.52±0.07  | 3.41±0.63  | 1.26±0.08  | 1.78±0.06  |
| 27 | Violaxanthin-<br>myristate-caprate   | [M+H] <sup>+</sup>     | 965.7  | 947.8 | 3.05±0.13  | 11.45±1.25 | 12.50±2.30 | 6.10±0.14  | 10.45±0.15 | 9.07±0.18  |
| 28 | Violaxanthin-<br>myristate-laurate   | [M+H] <sup>+</sup>     | 993.8  | 975.7 | 39.10±2.00 | 24.20±1.50 | 21.80±2.90 | 30.35±3.35 | 13.30±0.80 | 15.80±0.00 |
| 29 | Violaxanthin<br>dimyristate          | [M+H] <sup>+</sup>     | 1021.8 | 793.7 | 9.11±0.56  | 4.50±0.02  | 4.40±0.34  | 6.77±0.54  | 2.61±0.04  | 3.14±0.07  |
| 30 | Violaxanthin-<br>myristate-palmitate | [M+H] <sup>+</sup>     | 1050   | 793.8 | 1.93±0.02  | 0.80±0.04  | 0.87±0.05  | 1.33±0.01  | 0.39±0.06  | 0.51±0.05  |
| 31 | Violaxanthin<br>dipalmitate          | [M+H] <sup>+</sup>     | 1077.9 | 821.7 | 2.44±0.06  | 0.43±0.03  | 0.59±0.04  | 1.13±0.03  | 0.28±0.03  | 0.28±0.00  |
| 32 | Zeaxanthin<br>palmitate              | [M+H] <sup>+</sup>     | 807.8  | 551.5 | 3.92±0.13  | 3.97±0.24  | 3.49±0.35  | 3.03±0.13  | 2.94±0.12  | 2.24±0.20  |
| 33 | Zeaxanthin dilaurate                 | [M+H] <sup>+</sup>     | 933.9  | 533.2 | 1.31±0.02  | 1.44±0.05  | 1.29±0.05  | 1.10±0.05  | 1.14±0.09  | 0.87±0.05  |
| 34 | Zeaxanthin-laurate-<br>myristate     | [M+H] <sup>+</sup>     | 962.7  | 733.5 | 2.03±0.06  | 2.17±0.017 | 2.12±0.14  | 1.76±0.01  | 1.96±0.14  | 1.32±0.09  |
| 35 | Zeaxanthin<br>dimyristate            | [M+H] <sup>+</sup>     | 990    | 761.8 | 53.05±0.45 | 53.35±1.15 | 53.25±4.75 | 44.40±1.50 | 49.50±1.30 | 36.25±2.25 |
| 36 | Zeaxanthin-laurate-<br>palmitate     | [M+H] <sup>+</sup>     | 989.9  | 533.4 | 12.15±0.35 | 12.10±0.00 | 11.20±0.70 | 10.29±0.52 | 11.50±0.60 | 8.79±0.71  |
| 37 | Zeaxanthin-<br>myristate-palmitate   | [M+H] <sup>+</sup>     | 1018.1 | 533.6 | 2.91±0.04  | 2.55±0.02  | 2.38±0.21  | 2.30±0.16  | 2.11±0.08  | 1.63±0.16  |
| 38 | Zeaxanthin<br>dipalmitate            | [M+H-256] <sup>+</sup> | 789.5  | 533.5 | 2.47±0.20  | 1.550.09±  | 1.64±0.29  | 1.81±0.13  | 1.33±0.07  | 1.01±0.01  |
| 39 | zeaxanthin-<br>palmitate-stearate    | [M+H] <sup>+</sup>     | 1074.1 | 789.8 | 0.01±0.00  | 0.01±0.00  | 0.01±0.00  | 0.01±0.00  | 0.01±0.00  | N.D.       |

|                          |                                 |                       |        |       |                 |                  |                  |                 |                 |                  |
|--------------------------|---------------------------------|-----------------------|--------|-------|-----------------|------------------|------------------|-----------------|-----------------|------------------|
| 40                       | zeaxanthin-oleate-<br>palmitate | [M+H] <sup>+</sup>    | 1071.9 | 789.8 | 0.02±0.00       | 0.02±0.00        | 0.01±0.00        | 0.02±0.00       | 0.02±0.00       | N.D.             |
| 41                       | β-cryptoxanthin<br>laurate      | [M+H] <sup>+</sup>    | 735.8  | 535.5 | 7.65±0.15       | 5.74±0.36        | 4.47±0.26        | 5.40±0.13       | 5.04±0.04       | 3.78±0.54        |
| 42                       | β-cryptoxanthin<br>myristate    | [M+H] <sup>+</sup>    | 763.9  | 535.5 | 12.50±0.00      | 7.92±0.17        | 7.88±0.19        | 8.24±0.11       | 7.52±0.19       | 6.15±0.34        |
| 43                       | β-cryptoxanthin<br>palmitate    | [M+H] <sup>+</sup>    | 791.9  | 535.5 | 4.20±0.12       | 2.28±0.22        | 2.64±0.10        | 2.42±0.10       | 2.07±0.14       | 1.51±0.06        |
| 44                       | Rubixanthin caprate             | [M+H] <sup>+</sup>    | 707.7  | 535.6 | 0.19±0.03       | 0.14±0.01        | 0.14±0.02        | 0.15±0.01       | 0.11±0.01       | 0.11±0.01        |
| 45                       | Rubixanthin laurate             | [M+H] <sup>+</sup>    | 735.6  | 535.4 | 7.31±0.53       | 5.10±0.52        | 6.09±0.36        | 5.31±0.09       | 5.15±0.13       | 3.80±0.07        |
| 46                       | Rubixanthin<br>palmitate        | [M+H] <sup>+</sup>    | 791.7  | 535.4 | 4.92±0.02       | 2.65±0.00        | 2.81±0.15        | 3.08±0.08       | 2.55±0.13       | 2.05±0.15        |
| 47                       | Neochrome<br>palmitate          | [M+H-18] <sup>+</sup> | 821.7  | 565.5 | 1.99±0.02       | 2.30±0.02        | 2.44±0.11        | 2.16±0.09       | 1.57±0.06       | 1.61±0.01        |
| Total Carotene           |                                 |                       |        |       | 3065.59±32.32 a | 2228.31±129.36 b | 2164.10±105.46 b | 1938.83±34.00 c | 1833.85±28.24 c | 1347.95±151.87 d |
| Total Xanthophylls       |                                 |                       |        |       | 87.52±0.17 a    | 71.69±3.82 b     | 71.62±6.49 b     | 55.57±1.90 c    | 52.41±0.66 c    | 44.46±2.16 d     |
| Total Xanthophyll esters |                                 |                       |        |       | 296.25±1.07 a   | 294.52±1.43 b    | 243.97±15.13 b   | 227.92±2.70 c   | 201.88±4.43 d   | 168.64±7.91 e    |
| Total Carotenoids        |                                 |                       |        |       | 3446.36±31.42 a | 2542.96±134.19 b | 2473.32±126.51 b | 2222.33±42.59 c | 2081.47±32.92 c | 1556.50±161.85 d |
| Degradation rate (%)     |                                 |                       |        |       | -               | 26.21            | 28.23            | 35.52           | 39.60           | 54.84            |

Values are expressed as means ± SD of 3 replicate; values followed by different letters in the same column are significantly different by Duncan's multiple range test ( $P < 0.05$ ); N.D. represent not detected.

**Table S4.** The results of Spearman correlation analysis.

|                                | Oxalic acid | Tartaric acid | Malic acid | Lactic acid | Acetic Acid | Citric Acid | Succinic Acid | pH      | Crude fat | FFAs     |
|--------------------------------|-------------|---------------|------------|-------------|-------------|-------------|---------------|---------|-----------|----------|
| $\alpha$ -Carotene             | 0.6         | 0.319         | -0.143     | -0.829*     | -0.820*     | 0.829*      | -0.429        | 0.829*  | 0.829*    | -0.829*  |
| Lycopene                       | 0.829*      | 0.638         | -0.486     | -1.000**    | -0.941**    | 1.000**     | -0.771        | 1.000** | 1.000**   | -1.000** |
| $\gamma$ -Carotene             | 0.486       | 0.116         | -0.257     | -0.771      | -0.698      | 0.771       | -0.543        | 0.771   | 0.771     | -0.771   |
| $\beta$ -Carotene              | 0.371       | -0.029        | -0.543     | -0.714      | -0.516      | 0.714       | -0.829*       | 0.714   | 0.714     | -0.714   |
| $\epsilon$ -Carotene           | 0.714       | 0.435         | -0.6       | -0.943**    | -0.820*     | 0.943**     | -0.886*       | 0.943** | 0.943**   | -0.943** |
| Antheraxanthin                 | 0.714       | 0.435         | -0.6       | -0.943**    | -0.820*     | 0.943**     | -0.886*       | 0.943** | 0.943**   | -0.943** |
| Zeaxanthin                     | 0.6         | 0.812*        | -0.086     | -0.771      | -0.880*     | 0.771       | -0.6          | 0.771   | 0.771     | -0.771   |
| Violaxanthin                   | 0.841*      | 0.882*        | -0.406     | -0.841*     | -0.893*     | 0.841*      | -0.638        | 0.841*  | 0.841*    | -0.841*  |
| Neoxanthin                     | 0.714       | 0.406         | -0.257     | -0.771      | -0.759      | 0.771       | -0.314        | 0.771   | 0.771     | -0.771   |
| Lutein                         | 0.771       | 0.58          | -0.257     | -0.943**    | -0.941**    | 0.943**     | -0.543        | 0.943** | 0.943**   | -0.943** |
| $\beta$ -Cryptoxanthin         | 0.143       | -0.29         | -0.371     | -0.543      | -0.334      | 0.543       | -0.657        | 0.543   | 0.543     | -0.543   |
| Apocarotenal                   | -0.314      | -0.145        | 0.2        | -0.143      | -0.213      | 0.143       | -0.543        | 0.143   | 0.143     | -0.143   |
| $\alpha$ -Cryptoxanthin        | 0.486       | 0.319         | -0.029     | -0.714      | -0.698      | 0.714       | -0.314        | 0.714   | 0.714     | -0.714   |
| (E/Z)-Phytoene                 | 0.829*      | 0.638         | -0.486     | -1.000**    | -0.941**    | 1.000**     | -0.771        | 1.000** | 1.000**   | -1.000** |
| Antheraxanthin dipalmitate     | 0.655       | 0.133         | -0.655     | -0.655      | -0.417      | 0.655       | -0.393        | 0.655   | 0.655     | -0.655   |
| Lutein caprate                 | 0.543       | 0.377         | 0.029      | -0.314      | -0.395      | 0.314       | 0.314         | 0.314   | 0.314     | -0.314   |
| Lutein palmitate               | 0.886*      | 0.667         | -0.371     | -0.886*     | -0.880*     | 0.886*      | -0.429        | 0.886*  | 0.886*    | -0.886*  |
| 5,6epoxy-lutein dilaurate      | 0.829*      | 0.638         | -0.486     | -1.000**    | -0.941**    | 1.000**     | -0.771        | 1.000** | 1.000**   | -1.000** |
| Lutein dilaurate               | 0.714       | 0.754         | -0.371     | -0.886*     | -0.880*     | 0.886*      | -0.771        | 0.886*  | 0.886*    | -0.886*  |
| Lutein dimyristate             | 0.486       | 0.319         | -0.029     | -0.714      | -0.698      | 0.714       | -0.314        | 0.714   | 0.714     | -0.714   |
| Lutein dipalmitate             | 0.486       | 0.319         | -0.029     | -0.714      | -0.698      | 0.714       | -0.314        | 0.714   | 0.714     | -0.714   |
| Neochrome palmitate            | 0.486       | 0.696         | 0.143      | -0.543      | -0.759      | 0.543       | -0.257        | 0.543   | 0.543     | -0.543   |
| Rubixanthin caprate            | 0.486       | 0.116         | -0.257     | -0.771      | -0.698      | 0.771       | -0.543        | 0.771   | 0.771     | -0.771   |
| Rubixanthin laurate            | 0.371       | 0.058         | 0.029      | -0.657      | -0.638      | 0.657       | -0.257        | 0.657   | 0.657     | -0.657   |
| Rubixanthin palmitate          | 0.486       | 0.116         | -0.257     | -0.771      | -0.698      | 0.771       | -0.543        | 0.771   | 0.771     | -0.771   |
| Violaxanthin dibutyrate        | 0.829*      | 0.522         | -0.714     | -0.886*     | -0.759      | 0.886*      | -0.771        | 0.886*  | 0.886*    | -0.886*  |
| Violaxanthin laurate           | -0.143      | 0.261         | 0.257      | -0.086      | -0.273      | 0.086       | -0.371        | 0.086   | 0.086     | -0.086   |
| Violaxanthin myristate         | 0.829*      | 0.638         | -0.486     | -1.000**    | -0.941**    | 1.000**     | -0.771        | 1.000** | 1.000**   | -1.000** |
| Violaxanthin palmitoleate      | 0.886*      | 0.754         | -0.371     | -0.714      | -0.698      | 0.714       | -0.2          | 0.714   | 0.714     | -0.714   |
| Violaxanthin dilaurate         | 0.657       | 0.261         | -0.6       | -0.771      | -0.638      | 0.771       | -0.657        | 0.771   | 0.771     | -0.771   |
| Violaxanthin-myristate-caprate | -0.086      | 0.493         | 0.6        | 0.086       | -0.213      | -0.086      | 0.2           | -0.086  | -0.086    | 0.086    |
| Violaxanthin-myristate-laurate | 0.657       | 0.261         | -0.6       | -0.771      | -0.638      | 0.771       | -0.657        | 0.771   | 0.771     | -0.771   |
| Violaxanthin dimyristate       | 0.657       | 0.261         | -0.6       | -0.771      | -0.638      | 0.771       | -0.657        | 0.771   | 0.771     | -0.771   |

|                                  |        |        |        |          |          |         |          |         |         |          |
|----------------------------------|--------|--------|--------|----------|----------|---------|----------|---------|---------|----------|
| Violaxanthin-myristate-palmitate | 0.6    | 0.203  | -0.371 | -0.714   | -0.638   | 0.714   | -0.429   | 0.714   | 0.714   | -0.714   |
| Violaxanthin dipalmitate         | 0.6    | 0.203  | -0.371 | -0.714   | -0.638   | 0.714   | -0.429   | 0.714   | 0.714   | -0.714   |
| Zeaxanthin palmitate             | 0.771  | 0.754  | -0.429 | -0.943** | -0.941** | 0.943** | -0.829*  | 0.943** | 0.943** | -0.943** |
| Zeaxanthin dilaurate             | 0.714  | 0.754  | -0.371 | -0.886*  | -0.880*  | 0.886*  | -0.771   | 0.886*  | 0.886*  | -0.886*  |
| Zeaxanthin-laurate-myristate     | 0.6    | 0.812* | -0.086 | -0.771   | -0.880*  | 0.771   | -0.6     | 0.771   | 0.771   | -0.771   |
| Zeaxanthin dimyristate           | 0.6    | 0.812* | -0.086 | -0.771   | -0.880*  | 0.771   | -0.6     | 0.771   | 0.771   | -0.771   |
| Zeaxanthin-laurate-palmitate     | 0.6    | 0.435  | -0.486 | -0.829*  | -0.698   | 0.829*  | -0.771   | 0.829*  | 0.829*  | -0.829*  |
| Zeaxanthin-myristate-palmitate   | 0.829* | 0.638  | -0.486 | -1.000** | -0.941** | 1.000** | -0.771   | 1.000** | 1.000** | -1.000** |
| Zeaxanthin dipalmitate           | 0.486  | 0.116  | -0.257 | -0.771   | -0.698   | 0.771   | -0.543   | 0.771   | 0.771   | -0.771   |
| Zeaxanthin-palmitate-stearate    | 0.829* | 0.638  | -0.486 | -1.000** | -0.941** | 1.000** | -0.771   | 1.000** | 1.000** | -1.000** |
| Zeaxanthin-oleate-palmitate      | -0.2   | -0.435 | -0.086 | -0.257   | -0.091   | 0.257   | -0.486   | 0.257   | 0.257   | -0.257   |
| $\beta$ -cryptoxanthin laurate   | 0.543  | 0.232  | -0.657 | -0.829*  | -0.638   | 0.829*  | -0.943** | 0.829*  | 0.829*  | -0.829*  |
| $\beta$ -cryptoxanthin myristate | 0.543  | 0.174  | -0.486 | -0.829*  | -0.698   | 0.829*  | -0.771   | 0.829*  | 0.829*  | -0.829*  |
| $\beta$ -cryptoxanthin palmitate | 0.6    | 0.319  | -0.143 | -0.829*  | -0.820*  | 0.829*  | -0.429   | 0.829*  | 0.829*  | -0.829*  |

\*  $p<0.05$  ; \*\*  $p<0.01$
